# Supplementary material for: Mechanistic study of salidroside on ovalbumin-induced asthmatic model mice based on untargeted metabolomics analysis
Source: Royal Society of Chemistry journal article supplement (doi:10.1039/d2fo02225g), 2022-11-18
Supplement: d2fo02225g1.pdf [file d2fo02225g1.pdf]

**Table S1** HE staining score for evaluating the inflammation in lung (Dong et al., 2021)

| Score | Description                                                                          |
|-------|--------------------------------------------------------------------------------------|
| 0     | No inflammatory cells can be detected.                                               |
| 1     | Inflammatory cells were occasionally observed.                                       |
| 2     | Bronchi were surrounded by 1–3 layer of inflammatory cells.                          |
| 3     | Bronchi or vessels were surrounded by 4–5 layer of inflammatory cells.               |
| 4     | Most bronchi or vessels were surrounded by more than 5 layers of inflammatory cells. |

**Table S2** Masson staining score (Zhou et al., 2016)

| Score   | Description                                                                                                                             |
|---------|-----------------------------------------------------------------------------------------------------------------------------------------|
| 0 (-)   | No pulmonary fibrosis.                                                                                                                  |
| 1 (+)   | Light degree of pulmonary fibrosis, lesion range <20% in the whole lung.                                                                |
| 2 (++)  | Moderate pulmonary fibrosis, lesion range ~20–50% in the whole lung.                                                                    |
| 3 (+++) | Severe pulmonary fibrosis, lesion range >50% in the whole lung, accompanied by alveolar fusion and lung parenchyma structural disorder. |

**Table S3** Primer sequences used for RT-qPCR

| Gene name    | Full name                          | Primer sequence (5'-3')                                        |
|--------------|------------------------------------|----------------------------------------------------------------|
| <i>Actb</i>  | Actin, beta                        | Forward: GATATCGCTGCGCTGGTCG<br>Reverse: CATTCCCACCATCACACCCT  |
| <i>Acta2</i> | Smooth muscle actin                | Forward: GTACCACCATGTACCCAGGC<br>Reverse: GCTGGAAGGTAGACAGCGAA |
| <i>Mmp2</i>  | Matrix metalloproteinase 2         | Forward: GCCCCCATGAAGCCTTGTTT<br>Reverse: TAGCGGTCTCGGGACAGAAT |
| <i>Mmp9</i>  | Matrix metalloproteinase 9         | Forward: AAAACCTCCAACCTCACGGA<br>Reverse: CACAGCGTGGTGTTCGAATG |
| <i>Tgfb1</i> | Transforming growth factor, beta 1 | Forward: ACTGGAGTTGTACGGCAGTG<br>Reverse: GGGGCTGATCCCGTTGATTT |
